# Supplementary material for: Antibacterial Activity of Blue Light against Nosocomial Wound Pathogens Growing Planktonically and as Mature Biofilms
Source: PubMed Central journal article supplement (PMC4907187; doi:10.1128/aem.00756-16), 2016-06-13
Supplement: AEM.00756-16_zam999117232so1.pdf [file AEM.00756-16_zam999117232so1.pdf]

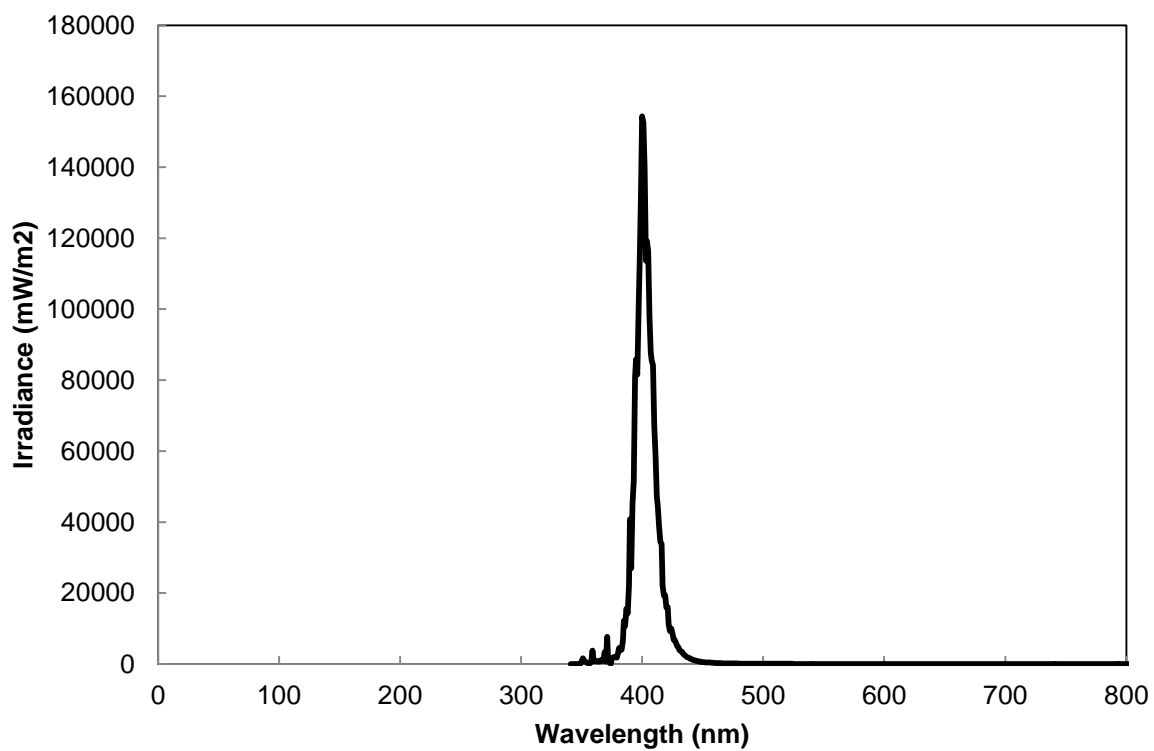

**Figure S1.** Emission spectrum of Henkel Loctite blue light array determined using an Ocean Optics USB2000 spectrometer
